33 Insects rely on a sophisticated olfactory system to detect volatile chemicals in the environment. Several  
34 protein families are involved, with odorant receptors (ORs) and ionotropic receptors (IRs), two types of  
35 ligand-gated ion channels, being the key detecting elements<sup>9-11</sup>. On the surface of the antenna, the main  
36 olfactory organ, numerous hair-like structures (sensilla) contain olfactory sensory neurons (OSNs), which  
37 represent the basic units of sensory perception. Sensilla involved in olfaction occur in three morphological  
38 types: basiconic, trichoid, and coeloconic. In the vinegar fly, *Drosophila melanogaster*<sup>9, 12</sup>, as well as in  
39 other investigated insect species<sup>13-15</sup>, ORs are expressed in the dendritic membrane of OSNs housed in  
40 basiconic and trichoid sensilla, whereas IRs are expressed by OSNs housed in coeloconic sensilla. ORs are  
41 extremely divergent and different insect species express from ten *OR* genes in head lice<sup>16</sup> to more than 300  
42 in ants<sup>17</sup>. The OR type expressed in an OSN dictates the odorant specificity of the neuron<sup>18</sup>. ORs are co-  
43 expressed together with the conserved odorant receptor-co-receptor (Orco), which is essential for dendritic  
44 localization of ORs and OR-dependent odorant detection<sup>10, 19</sup>. IRs usually are less divergent<sup>20</sup> and at least  
45 two IR co-receptors, IR8a and IR25a, form ligand-gated ion channels with other odorant-tuned IRs<sup>9, 21</sup>. The  
46 different receptor types, however, do not only differ regarding their local expression but also in their  
47 response profiles. While most ORs are broadly tuned to alcohols, aldehydes, aromatics, esters, or terpenes<sup>18</sup>,  
48 IRs primarily respond to a restricted subset of odors including mainly acids and amines<sup>22</sup>. At least in  
49 *Drosophila* and *Aedes aegypti*, IR8a is required for acid detection<sup>23, 24</sup>. IR25a, on the other hand, seems to  
50 be co-expressed with IRs responding to amines<sup>25</sup> and is also involved in the detection of temperature<sup>26</sup>,  
51 humidity<sup>27</sup> and salt<sup>28</sup>.

52 The tobacco hawkmoth *Manduca sexta* (Lepidoptera: Sphingidae) is an established model for insect  
53 olfaction<sup>13</sup> and odor-guided behavior<sup>29</sup>. The recent identification of 73 *OR* genes and 21 olfactory *IR* genes  
54 and their expression patterns in male and female moths<sup>13</sup> and the establishment of the Crispr/Cas 9  
55 technique in *M. sexta*<sup>30</sup> has made the species to an even more powerful model for olfactory neuroethology.  
56 The larvae of these moths feed on various plants of the family Solanaceae, including coyote tobacco  
57 (*Nicotiana attenuata*) and jimson weed (*Datura wrightii*). It was reported that a single *M. sexta* caterpillar  
58 consumes 1-10 tobacco plants until pupation<sup>31</sup>, resulting in complete defoliation of the plants and  
59 accumulation of frass under the plant (Fig. 1 a). Therefore, it is crucial for female *M. sexta* to find a suitable  
60 host plant that is not already occupied by a conspecific larva.

61 Volatiles emitted from larval frass have been shown to act as kairomones and attract parasitoids and  
62 predators<sup>32-35</sup>. The smell of larval frass, therefore, not only indicates the occupancy of the host plant, and  
63 the resulting potential for intra-specific competition, but also an increased susceptibility to parasitization  
64 and predation. Hence, female moths should avoid sites that are already occupied by conspecific larvae and  
65 could do so by e.g. detecting chemical cues emanating from larval frass. In several insect species, female  
66 oviposition has been found to be deterred by conspecific larval frass<sup>36</sup>. Thus, larval frass alone is sufficient

67 to signal potential competition to the female. However, the molecular and cellular mechanisms by which  
68 female insects avoid frass remain unknown.

69 Here we investigate whether the oviposition of *M. sexta* is deterred by frass from its larvae. We first show  
70 that *M. sexta* females, like other insects, display oviposition aversion toward conspecific caterpillar frass  
71 stemming from different host plants. Next, we identify specific carboxylic acids emitted from the frass as  
72 key compounds that confer oviposition aversion. By performing electrophysiological recordings, calcium  
73 imaging and behavioral analyses with mutant moths that either lack *Orco*, or one of the IR co-receptors,  
74 *Ir8a* or *Ir25a*, we demonstrate that IR8a is essential for acid-mediated frass avoidance during oviposition.

## 75 **Results and discussion**

76 **Frass of caterpillars fed on *N. attenuata* repels oviposition.** To test whether gravid females of *M. sexta*  
77 avoid ovipositing in the presence of frass, we tested their behavior in a two-choice assay in a wind tunnel.  
78 The moths were allowed to oviposit for 3 min either on an undamaged *N. attenuata* plant that was equipped  
79 with 10 g of larval frass (from caterpillars which had fed on other *N. attenuata* plants) or on an undamaged  
80 control plant (Fig. 1 b). In these experiments, the moths laid on average  $14.3 \pm 1.7$  eggs (mean  $\pm$  SEM)  
81 during the 3 min test on both plant. The allocation of eggs depended on the presence of frass with the moths  
82 laying significantly less eggs on the plant with caterpillar frass as compared to the control plant (Fig. 1 c).  
83 A similar preference was observed when moths were given a choice between a plant with frass and a control  
84 plant without frass in a steady-air tent (Supplementary Fig. 1), confirming that frass avoidance is consistent  
85 in different behavioral paradigms. We conclude that even in the absence of plant damage caterpillar frass  
86 induces oviposition avoidance in *M. sexta*. Former studies suggested that ovipositing *M. sexta* females  
87 mainly use plant- and larva-derived odors to avoid competition<sup>37,38</sup>. In our study, where the amount of frass  
88 was higher (but still ecologically reasonable, as we used frass that was produced by a single larvae during  
89 one night), frass alone was sufficient to induce oviposition avoidance. Females tested in our experiments  
90 were raised on artificial diet and had no prior experience with the plants or the frass. We therefore conclude  
91 that the frass-induced oviposition avoidance is innate.

92 **3-methylpentanoic acid and hexanoic acid govern oviposition avoidance to larval frass.** To identify  
93 the active compound responsible for frass avoidance, we raised *M. sexta* caterpillars on *N. attenuata* plants  
94 and afterwards collected the headspace of the resulting frass using a solid phase micro extraction (SPME)  
95 fiber. Gas chromatography–mass spectrometry (GC-MS) analysis revealed similar results as in a previous  
96 study<sup>33</sup>, with 3-methylpentanoic acid being the most abundant compound followed by two other branched  
97 aliphatic acids, 3-methylbutanoic acid and 4-methylpentanoic acid (Fig. 1 d).

98 To investigate the impact of these compounds on *M. sexta* oviposition, we pipetted 10  $\mu$ l of one of the  
99 compounds (diluted  $10^{-2}$  in mineral oil) on a filter paper and attached this filter paper 2 cm upwind of a  
100 detached *N. attenuata* leaf before presenting this leaf to a mated female in the wind tunnel. When compared

101 to a control leaf, where the attached filter paper just contained the solvent, only 3-methylpentanoic acid  
 102 elicited significant avoidance (Fig. 1 f, left panel). To address the behavioral sensitivity of *M. sexta* toward  
 103 3-methylpentanoic acid, we further performed wind tunnel test with lower amounts of the compound and  
 104 identified the behavioral threshold to be between  $10^{-4}$  and  $10^{-3}$  dilutions (i.e. between 9.3  $\mu\text{g}$  and 93  $\mu\text{g}$ )  
 105 (Fig. 1 f, right panel).

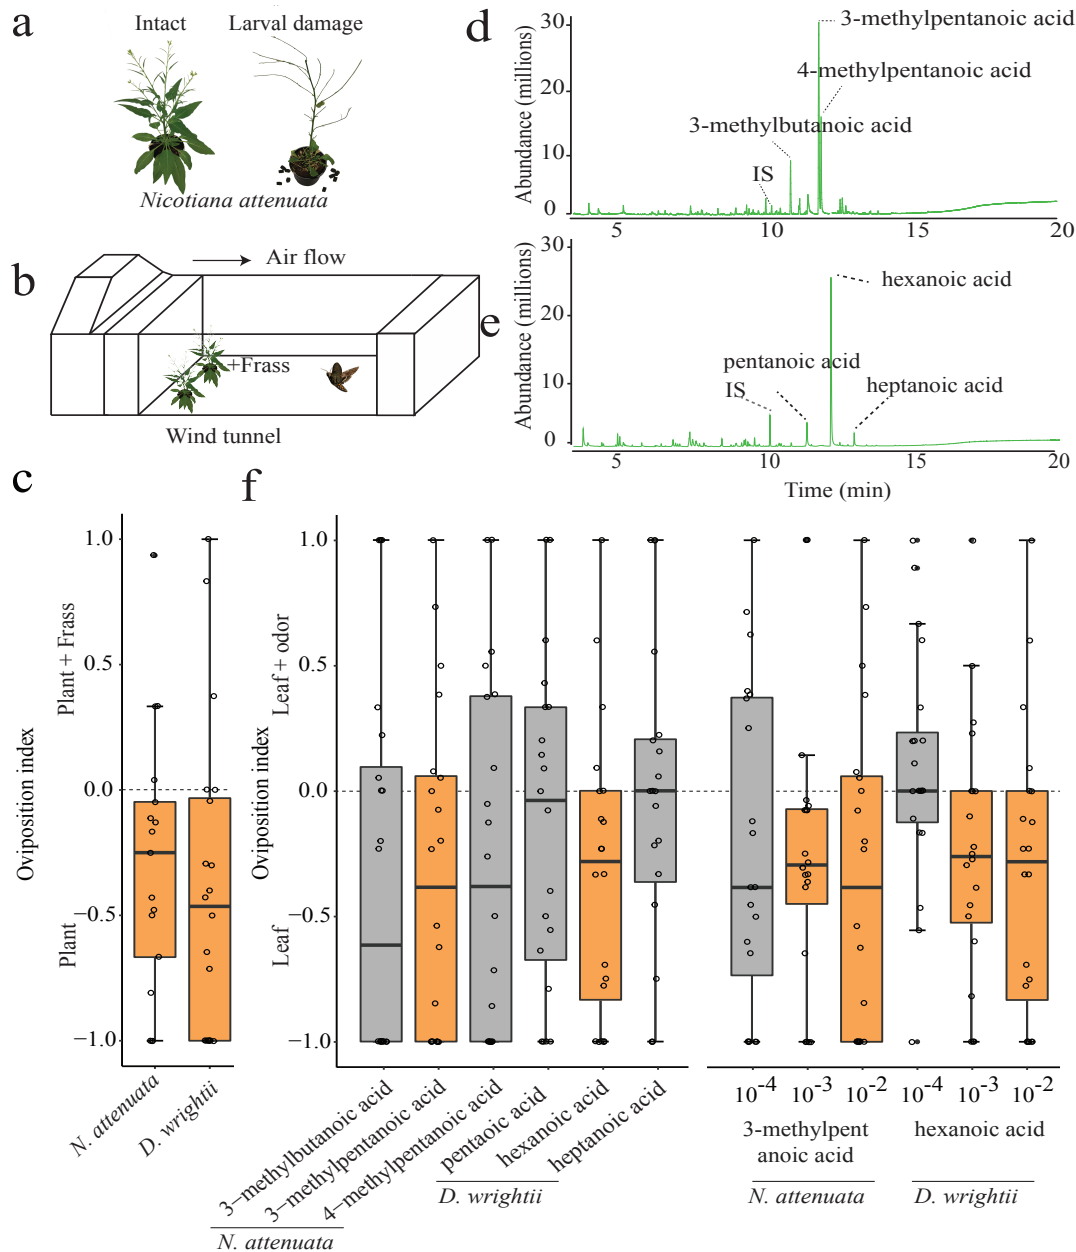

106  
 107 **Figure 1 | *M. sexta* oviposition on *N. attenuata* and *D. wrightii* are affected by larval frass.**  
 108 (a) *N. attenuata* plant with and without larval damage. (b) Schematic drawing of wind tunnel assay.  
 109 (c) Oviposition index of mated females toward frass of *M. sexta* caterpillars reared on *N. attenuata*  
 110 and *D. wrightii*. Oviposition index = (number of eggs on plant with frass - number of eggs on plant



111 without frass) / total egg number. (d) GC-MS profile of headspace of frass from *M. sexta* caterpillar  
112 reared on *N. attenuata*. IS, internal standard. (e) GC-MS profile of headspace of frass from *M.*  
113 *sexta* caterpillar reared on *D. wrightii*. IS, internal standard. (f) Oviposition index of gravid females  
114 to carboxylic acids emitted from *M. sexta* caterpillar frass (left panel). (f) Oviposition index of  
115 gravid females to various doses of 3-methylpentanoic acid and hexanoic acid (right panel).  
116 Deviation of the index against zero was tested with Wilcoxon signed-rank test (n=17-20). \* p<0.05.  
117 Boxplots depict median and upper and lower quartile; whiskers depict quartiles +/- 1.5× the  
118 interquartile range (IQR). Any data points above the superior or below the inferior whisker values  
119 are considered as outliers. All data were included in the statistical analysis. Orange boxes depict  
120 significant repulsion of frass and/or individual compounds.

121

122 Having shown that frass from caterpillars reduces the attraction of *N. attenuata* plants to ovipositing females,  
123 we asked whether this holds true also for the relationship of *M. sexta* and its other main host plant *D.*  
124 *wrightii*. We now let female moths choose to oviposit either on a *D. wrightii* leaf that was equipped with  
125 frass (from caterpillars raised on *D. wrightii*) or on a control leaf without frass. Again, females preferred to  
126 oviposit on the control leaf (Fig. 1 c), suggesting that also at the host plant *D. wrightii*, frass induces  
127 oviposition avoidance in *M. sexta* females.

128 To identify the active compounds responsible for frass avoidance in *D. wrightii*, we raised *M. sexta*  
129 caterpillars on *D. wrightii* plants and then collected and analyzed the volatiles as before. This time the  
130 chemical profile of the frass was dominated by hexanoic acid, and accompanied by two other minor  
131 compounds, heptanoic acid and pentanoic acid (Fig. 1 e). When again an ovipositing female had to choose  
132 between a *D. wrightii* leaf that was equipped with one of the three acids and a control leaf, only leaves with  
133 hexanoic acid (10 µl at 10<sup>-2</sup> dilution) were avoided (Fig. 1 f, left panel). This avoidance could still be  
134 observed even when we reduced the amount of hexanoic acid tenfold (Fig. 1 f, right panel). We conclude  
135 that hexanoic acid is the major compound governing frass avoidance of ovipositing females in the context  
136 of *D. wrightii*. When performing choice experiments in the wind tunnel with additional aliphatic acids and  
137 the two host plants, we found that only six-carbon aliphatic acids elicited avoidance (Supplementary Fig.  
138 2).

139 **Both the odorant co-receptor Orco and the ionotropic co-receptor 8a participate in acid sensing.** To  
140 determine which olfactory pathway is governing the detection of 3-methylpentanoic acid and hexanoic acid,  
141 we performed electroantennography (EAG) measurements on wild type (WT) moths, and on odorant co-  
142 receptor heterozygous (*Orco*<sup>+/-</sup>) and homozygous (*Orco*<sup>-/-</sup>) moths that were recently generated in our lab  
143 using CRISPR/Cas9 genome editing<sup>30</sup>. While WT moths and *Orco*<sup>+/-</sup> moths exhibited robust EAG

144 responses to the acids, *Orco*<sup>-/-</sup> moths showed reduced responses (Supplementary Fig. 3). However, clear  
145 EAG responses to the acids remained, indicating that the IR pathway is also involved in acid detection.  
146 To address whether the remaining response to acids in *Orco*<sup>-/-</sup> moths were indeed resulting from activation  
147 of the IR pathway, we generated two IR mutant lines, *Ir8a*<sup>-/-</sup> and *Ir25a*<sup>-/-</sup>, using again CRISPR/Cas9  
148 genome editing. The resulting *Ir8a*<sup>-/-</sup> mutant contained a 339bp deletion (93bp at exon2, 170bp at intron2  
149 and 76bp at exon3) while the *Ir25a*<sup>-/-</sup> mutant contained a 154bp deletion (154bp at exon2) in the genome.  
150 As both deletions resulted in frame-shifts and the occurrence of premature stop codons (Supplementary Fig.  
151 4A), we expected both mutations to result in non-functional ionotropic co-receptors. We found no  
152 difference regarding pupal weight and length in neither *Ir8a*<sup>-/-</sup> nor *Ir25a*<sup>-/-</sup> mutants, when compared to the  
153 heterozygous controls (Supplementary Fig. 4B). Furthermore, in EAG experiments both mutants exhibited  
154 normal responses to the OR-detected pheromone, bombykal (Supplementary Fig. 4C) suggesting the  
155 absence of relevant off-target effects.  
156 However, when performing EAG experiments with *Ir8a*<sup>-/-</sup> and *Ir25a*<sup>-/-</sup> moths, only *Ir8a*<sup>-/-</sup> moths exhibited  
157 significantly reduced response to both behaviorally active acids when compared to WT moths, while the  
158 acid responses in *Ir25a*<sup>-/-</sup> moths remained unaffected (Fig. 2a).  
159 **IR8a pathway is essential for detecting and avoiding acids from caterpillar frass.** We next asked which  
160 sensillum type is involved in the detection of the acids in caterpillar frass. According to the well-studied  
161 *Drosophila*<sup>9, 18, 39, 40</sup>, IR-expressing OSNs are mainly housed in coeloconic sensilla. Furthermore, in *M.*  
162 *sexta*, previous single-sensillum recordings (SSRs) from trichoid and basiconic sensilla showed little to no  
163 responses to acids<sup>41, 42</sup>. We therefore hypothesized that coeloconic sensilla of *M. sexta* house IR-expressing  
164 OSNs that are involved in acid detection. Contrary to the antenna of female *D. melanogaster*, which  
165 contains only 54 coeloconic sensilla<sup>40</sup>, the antenna of female *M. sexta* carries about 3600<sup>41</sup>. This makes  
166 the identification and recording from identified individual coeloconic sensilla almost impossible. We,  
167 therefore, recorded from 28 coeloconic sensilla from the middle part of the antenna, which should cover a  
168 wide range of functional types, and stimulated them with a set of 52 odorants from different chemical  
169 classes (Supplementary Fig. 5). Consistent with previous studies in *D. melanogaster*<sup>40</sup> and *Bombyx mori*<sup>43</sup>,  
170 OSNs housed in coeloconic sensilla in wild type *M. sexta* were mainly activated by acids and amines. The  
171 two behaviorally active acids activated mainly OSNs in non-overlapping groups of coeloconic sensilla. The  
172 number of coeloconic sensilla responding to hexanoic acid was about two times higher than those  
173 responding to 3-methylpentanoic acid and the intensity of responses to hexanoic acid was stronger.  
174

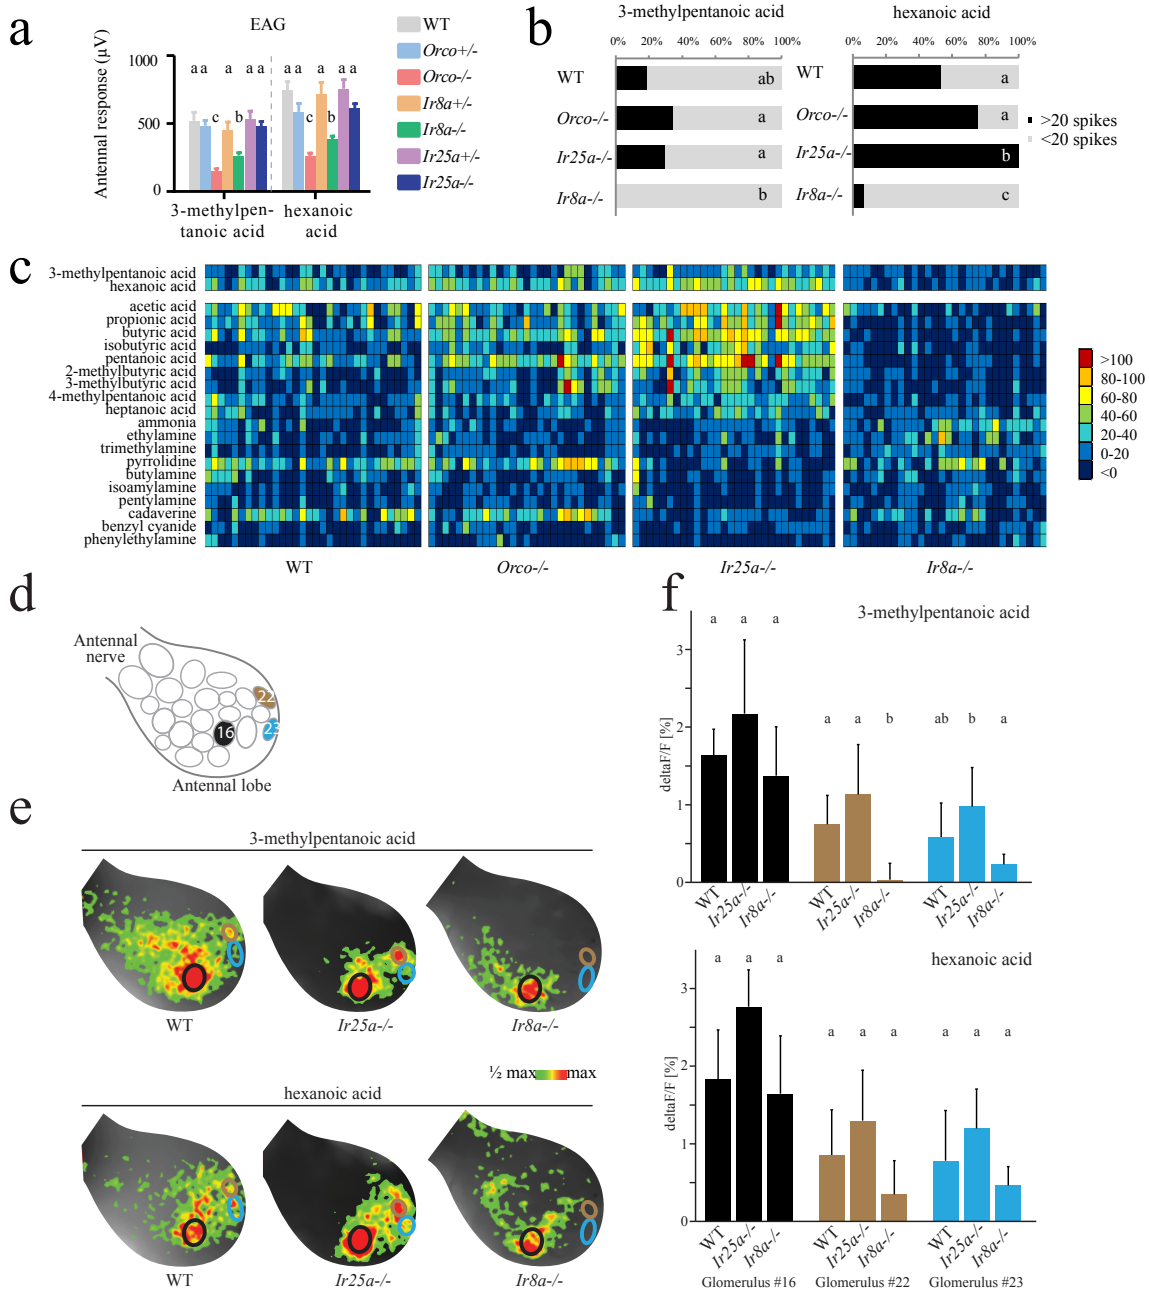

175

176 **Figure 2 | Detection and processing of frass-emitted** (a) Electroantennogram responses (EAG,  
177 in  $\mu\text{V} \pm \text{SEM}$ , the response to solvent was subtracted) of *M. sexta* antennae isolated from wild  
178 type (WT), *Orco*<sup>-/-</sup> (*Orco* mutant), *Orco*<sup>+/-</sup> (*Orco* heterozygous), *Ir8a*<sup>-/-</sup> (*Ir8a* mutant), *Ir8a*<sup>+/-</sup> (*Ir8a*  
179 heterozygous), *Ir25a*<sup>-/-</sup> (*Ir25a* mutant), *Ir25a*<sup>+/-</sup> (*Ir25a* heterozygous). EAG responses to 3-  
180 methylpentanoic acid and hexanoic acid. (b) Percentage of coeloconic sensilla responding to the  
181 two behaviorally active acids in different genotypes (c) Heat map representation of SSR  
182 responses of coeloconic sensilla from different moth genotypes. (d) Schematic of 23 putative

183 olfactory glomeruli at the dorsal surface of the right antennal lobe; the schematic was created for  
184 each individual moth based on the activation patterns of 19 diagnostic odorants<sup>45</sup>; numbers  
185 identify glomeruli that were most strongly activated by the tested acids (#16), or that showed acid-  
186 specific activation (#22, #23). (e) Examples of calcium imaging recordings in wildtype, *IR25a*<sup>-/-</sup>,  
187 and *IR8a*<sup>-/-</sup> female moths after stimulation with the two behaviorally active acids. The increase of  
188 fluorescence is color coded (see scale) and superimposed onto the view of the antennal lobe;  
189 circles indicate positions of glomeruli #16 (black outline), #22 (brown), #23 (blue). (f) Bars show  
190 the mean response of a glomerulus (after subtraction of the solvent response) to an odorant; error  
191 bars indicate standard deviation; bars with the same letter are not significantly different from each  
192 other (ANOVA, n=4-6 females/genotype).

193

194 We found reduced numbers of coeloconic sensilla responding to 3-methylpentanoic acid and hexanoic acid  
195 in *Ir8a*<sup>-/-</sup> moths, when comparing to the other three genotypes (Fig. 2b and c). Interestingly, increased  
196 numbers of coeloconic sensilla exhibited enhanced responses to acids in *Ir25a*<sup>-/-</sup> moths, whereas the  
197 responses to amines were almost abolished. The enhanced responses in *Ir25a*<sup>-/-</sup> moths toward acids could  
198 be due to more energy being available to OSNs responding to acids, as these OSNs no longer have to  
199 compete with amine-tuned OSNs in the same sensillum. Such a phenomenon has been reported for  
200 gustatory receptors (GRs), where sensory neurons in the same sensillum have been shown to interact,  
201 exhibiting competition, inhibition or activation<sup>44</sup>.—In conclusion, our results show that IR8a, but neither  
202 Orco nor IR25a, is required for acid detection in OSNs of coeloconic sensilla.

203 We conclude that IR8a is involved in the detection of the key compounds governing frass avoidance. We  
204 next asked, where in the antennal lobe (i.e. the first olfactory processing center of the moth's brain) this IR-  
205 related acid detection becomes processed. A recently published functional analysis of the moths' antennal  
206 lobe<sup>45</sup> revealed three glomeruli that strongly responded to acids. In another study<sup>30</sup>, activation of two of  
207 these glomeruli was not affected by knocking out the OR-coreceptor Orco, supporting that these two  
208 glomeruli become innervated by IR-expressing OSNs. When performing calcium imaging experiments with  
209 moths that either lacked a functional IR25a or IR8a, the responses to acids in *Ir25a* mutants were unaffected  
210 compared to control animals (Fig. 2 e, f). However, when testing *Ir8a* mutants, we observed a slightly  
211 reduced response to hexanoic acid and a significantly reduced response to 3-methylpentanoic acid (Fig. 2  
212 e, f) in only those two glomeruli that in the former study were independent of Orco. Together with the EAG  
213 results, we conclude that both Orco and IR8a, but not IR25a, are involved in acid sensing and that IR8a-  
214 expressing OSNs involved in the detection target a subset of glomeruli on the medial surface of the antennal  
215 lobe.

216 Finally, we asked whether any of the three co-receptors governs the behavioral avoidance towards acids in  
217 ovipositing *M. sexta*. Unfortunately, the oviposition rates of *Orco*<sup>-/-</sup> moths were too low to draw any  
218 conclusions regarding the involvement of Orco in the oviposition avoidance. One explanation for the  
219 conflicting result with our previous study<sup>30</sup> in terms of oviposition in *Orco*<sup>-/-</sup> moths is that Fandino et al  
220 (2019) used whole and large *D. wrightii* plants which probably provided a very strong visual stimulation.  
221 Interestingly, however, mutation of *Ir25a* did not affect the oviposition behavior (Fig. 3a), while *Ir8a*<sup>-/-</sup>  
222 moths were no longer repelled by the tested acids (Fig. 3b). We conclude that ovipositing females rely on  
223 IR8a for detection of acids from caterpillar frass.

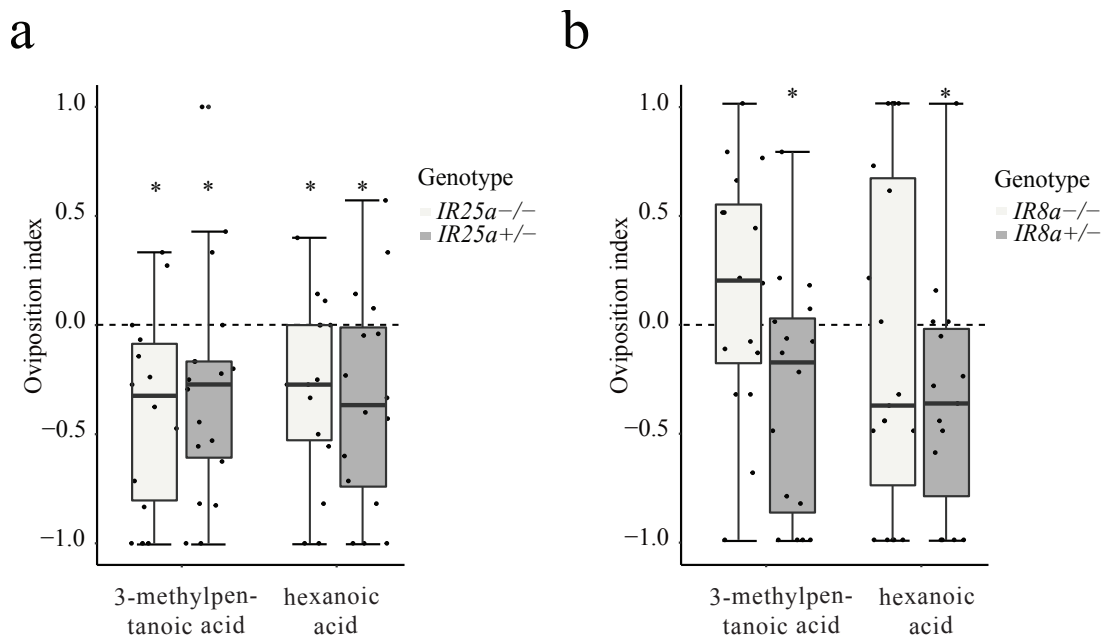

224  
225 **Figure 3 | IR8a is necessary for acid avoidance of ovipositing *M. sexta* females.** Two-choice  
226 assay showing the oviposition indexes of the homozygous and heterozygous (as a control) of  
227 *Ir25a* (a) and *Ir8a* (b) mutants for the frass-emitted compounds 3-methylpentanoic acid and  
228 hexanoic acid (for details on choice assay see Fig. 1 and methods section).

229  
230 Several studies have shown that larval frass and its odors deter female oviposition<sup>36</sup>. Frass-emitted acids  
231 play a crucial role in oviposition avoidance in moth species like *Ostrinia* species<sup>46</sup> and *Helicoverpa*  
232 *armigera*<sup>47</sup>. Moreover, it was shown that female parasitoid wasps, *Cotesia glomerata*, use acids emitted by  
233 host larvae as cues to locate their host<sup>48</sup>, and *M. sexta* caterpillar frass-emitted acids play a major role in  
234 attracting predators like ants<sup>33</sup>. Finally, one of the acids we identified in the caterpillar frass (hexanoic acid)  
235 has been shown to induce plant defenses against herbivores<sup>49</sup>. Obviously, carboxylic acids are potent signals  
236 for a gravid female to realize that at a given plant the female's offspring might face conspecific competitors,  
237 parasitoids and predators, as well as an already induced plant defense. Therefore, our finding that

238 ovipositing *M. sexta* females, like other moths, avoid emitted acids from larval frass is not unexpected.  
239 However, the neural and molecular mechanisms as well as the exact chemistry underlying this behavior  
240 remained elusive. In this study, we do not only show that *M. sexta* display oviposition aversion toward  
241 caterpillar frass, but also find that only the major volatile compounds (C<sub>6</sub> carboxylic acids) emitted are  
242 aversive for gravid females. By testing mutant moths in which we knocked out different olfactory co-  
243 receptors, we show that the co-receptors IR8a and Orco, but not IR25a, participate in acid detection. We  
244 also find that IR8a is necessary for the acid avoidance behavior of gravid *M. sexta* females, which helps the  
245 moth to protect its offspring from conspecific competition.  
246 It has been reported that *M. sexta* lay significantly less eggs on plants treated with herbivore-induced  
247 volatile organic compounds due to high predation rate on those treated plants<sup>31</sup>. Our finding that *M. sexta*  
248 avoids competition by sensing not only plant-emitted, but also frass-emitted compounds adds another layer  
249 of regulation to host choice in *M. sexta* to distinguish between healthy and damaged plants.

250

## 251 **Methods**

252 **Insect rearing and plant material.** All animals were reared at the Max Planck Institute for Chemical  
253 Ecology, Jena, Germany, as already described<sup>13</sup>. Briefly, eggs were collected from female *M. sexta* moths,  
254 which could freely oviposit on *D. wrightii* plants. Larvae used in the experiments were reared on artificial  
255 diet, under 16:8 h light: dark photo period with a relative humidity of 40% at 26°C. Naïve females were  
256 mated the second night after emergence and tested during the subsequent night. *M. sexta* frass was collected  
257 daily from fourth to fifth instar caterpillars which were raised on either *N. attenuata* or *D. wrightii*.

258 All plants were grown in a greenhouse as described<sup>50</sup>. Plants used for experiments were not yet flowering.  
259 Approximately 7 days before being used, plants were transferred into a climate chamber with the same  
260 settings as the moth flight cage (16:8 h light: dark photo period with a relative humidity of 40% at 26°C.).

261 **Chemical analysis.** We identified the volatiles of caterpillars frass using SPME (Solid Phase  
262 Microextraction) coupled with GC-MS (Gas chromatography–mass spectrometry). One gram of frass from  
263 caterpillars raised on either *D. wrightii* or *N. attenuata* were put into a 500-mL plastic container. A circular  
264 filter paper (diameter: 12 mm Whatman, Sigma-Aldrich USA) loaded with 10 µL of diluted bromodecane  
265 (1:10<sup>4</sup> in hexane) was used as an internal standard. Through a hole in the lid of the container, a SPME fiber  
266 (50 µm Divinylbenzene / Carboxen / Polydimethylsiloxane coating; Supelco) was exposed to the container  
267 headspace for 30 min at room temperature without agitation, and then introduced into the injector inlet for  
268 2 min at 250°C in split-less mode. The compounds adsorbed on the fiber were then analyzed by GC-MS  
269 (Agilent 6890 GC & 5975C MS, Agilent, USA). After fiber insertion, the column temperature was  
270 maintained at 40°C for 2 min and then increased to 260°C at 15°C min<sup>-1</sup>, followed by a final stage of 5 min



271 at 260°C. Compounds were identified by comparing mass spectra against synthetic standards and NIST 2.0  
272 library matches. All of the synthetic odorants that were tested and confirmed were purchased from Sigma  
273 ([www.sigmaaldrich.com](http://www.sigmaaldrich.com)) and were of the highest purity available.

274 **Behavioral experiments in the wind tunnel.** To investigate the behavioral significance of *M. sexta* frass  
275 from caterpillars which had fed on *N. attenuata*, we performed two choice tests in a transparent wind tunnel  
276 (220 × 90 × 90 cm<sup>3</sup>) at 25 °C, 70% relative humidity, 0.3 lux illumination, and a wind speed of 40 cm/s.  
277 Two non-flowering *N. attenuata* of similar size were placed at the upwind end of the wind tunnel. An empty  
278 petri dish (control) or a petri dish loaded with 10 gram of freshly collected frass (treatment) was placed at  
279 the base of the plant. A single 5<sup>th</sup> instar larva produce about 10 gram of frass per day. As described before<sup>45</sup>,  
280 mated female moths were released at the downwind side of the wind tunnel and during 3 min were allowed  
281 to oviposit on both plants. Afterwards, the number of eggs on both plants was counted and the eggs were  
282 gently removed after each test. Moths were tested only once and plants were exchanged after two tests. The  
283 positions of treatment and control plant within the wind tunnel were swapped after every second moth. The  
284 oviposition indexes were calculated as  $(T-C)/(T+C)$  where  $T$  is the number of eggs on the treatment site  
285 and  $C$  is the number of eggs on the control site.

286 To test the effect of *M. sexta* frass from caterpillars that had raised on *D. wrightii*, we conducted a similar  
287 two choice test in the wind tunnel. Due to the large size of *Datura* plants, we trimmed plants seven days  
288 before the experiments in a way that two leaves of similar size remained on opposite directions. An empty  
289 petri dish (control) or a petri dish loaded with 10 gram of freshly collected frass (treatment) was placed 10  
290 cm beneath the leaves. Again, mated female moths were allowed to oviposit on both control and treatment  
291 leaves and the resulting eggs and oviposition indexes were calculated afterwards.

292 To determine the functional significance of different volatiles emitted by the frass, we conducted two-  
293 choice tests in the wind tunnel. This time two freshly detached leaves of similar size were presented to the  
294 gravid female. Each leaf was attached to the tip of one of two upright acrylic glass poles (40 cm high and  
295 placed at the upwind end of the wind tunnel with a distance of 40 cm between them). Beneath each leaf we  
296 attached a square filter paper (2 × 2 cm<sup>2</sup>) loaded with 10 µL of diluted odorant (1:10<sup>2</sup>) or the solvent mineral  
297 oil alone. Moths, leaves and filter papers were tested only once. Experiments were conducted both with  
298 leaves from *N. attenuata* and *D. wrightii*.

299 **CRISPR/ Cas 9-based genome editing.** To determine which co-receptor is involved in the acid detection  
300 and acid-driven oviposition avoidance, we used olfactory receptor co-receptor (Orco) mutant moths<sup>30</sup>, and  
301 generated Ionotropic receptor 8a (Ir8a) and Ir25a two mutant lines. The *M. sexta* genome v.1.0 (Mansexv1.0)  
302 fasta file and the GFF3 file were submitted to the CHOPCHOP (<http://chopchop.cbu.uib.no>) database for

303 CRISPR/ Cas9 target selection sites. The OGS2.0 gene names, i.e. Msex2.10447-RB, isoform 1 and  
304 Msex2.02645-RA, isoform 1, were used to select target site. The sgRNA and Cas9 were synthesized by  
305 IDT (<https://eu.idtdna.com/pages/products/crispr-genome-editing/alt-r-crispr-cas9-system>). The  
306 microinjection and genotyping were carried out according to previously established procedures<sup>30</sup>. After the  
307 mutant lines were established, mutations were reconfirmed by Sanger sequencing.

308 **Electrophysiology.** To investigate the antennal responses to frass-emitted carboxylic acids, we  
309 performed EAG (Electroantennography) recording. We therefore clipped the antenna of a 3-day-old female  
310 moth directly above the scapulum and before the third last flagellum. Antenna preparation, stimuli delivery,  
311 data acquisition and analysis were carried out according to previously established procedures<sup>50</sup>. Odorants  
312 for EAG analyses were selected based on compounds identified in the headspace of caterpillar frass as well  
313 as structurally similar chemicals. 10 µl of diluted odor (1:10<sup>2</sup>) or solvent alone were pipetted onto a circular  
314 filter paper (diameter: 12 mm) and placed into a glass pipette. In addition, we performed single-sensillum  
315 recordings from coeloconic sensilla as described before<sup>42</sup>. Coeloconic sensilla were identified by their  
316 characteristic morphology. 29-32 Coeloconic sensilla were recorded in each genotype. Responses were  
317 quantified by counting all spikes recorded from an individual sensillum due to difficulties in reliably  
318 distinguishing spikes from individual neurons<sup>22, 40</sup>. The response was calculated as the difference in spike  
319 number observed 0.5 s before and after the stimulus onset. Heatmap was generated in Excel. Calcium  
320 imaging experiments were conducted as described previously<sup>45</sup>. CAS number and purities for odorants is  
321 listed in supplementary table 1.

322 **Statistics and figure preparation.** Sample size of behavioral experiments was determined based on a  
323 previous study<sup>45</sup>. Data were analyzed and plotted using RStudio (Version 1.1.414), R (Version 3.4.2; The  
324 R Project for Statistical Computing) and GraphPad InStat 3 ([https://www.graphpad.com/scientific-](https://www.graphpad.com/scientific-software/instat/)  
325 [software/instat/](https://www.graphpad.com/scientific-software/instat/)), while figures were organized and prepared using Adobe Illustrator CS5. The Wilks–  
326 Shapiro test was used to determine normality of each data set. Normally distributed data were assessed  
327 using t-tests. Not normally distributed data were analyzed using Wilcoxon signed-rank test, with the null  
328 hypothesis that the median of sampled values differs from zero. For the boxplots the whiskers were  
329 calculated as follows: the upper whisker equals the third quartile plus 1.5× the interquartile range (IQR)  
330 and the lower whisker equals the first quartile minus 1.5× the IQR. Any data points above the superior or  
331 below the inferior whisker values are considered as outliers. All data were included in the statistical analysis.

332 **Figure 1 | *M. sexta* oviposition on *N. attenuata* and *D. wrightii* are affected by larval frass. (a) *N.*  
333 *attenuata* plant with and without larval damage. (b) Schematic drawing of wind tunnel assay. (c)  
334 Oviposition index of mated females toward frass of *M. sexta* caterpillars reared on *N. attenuata* and *D.*  
335 *wrightii*. Oviposition index = (number of eggs on plant with frass - number of eggs on plant without frass)**

336 / total egg number. **(d)** GC-MS profile of headspace of frass from *M. sexta* caterpillar reared on *N. attenuata*.  
337 IS, internal standard. **(e)** GC-MS profile of headspace of frass from *M. sexta* caterpillar reared on *D. wrightii*.  
338 IS, internal standard. **(f)** Oviposition index of gravid females to carboxylic acids emitted from *M. sexta*  
339 caterpillar frass (left panel). **(f)** Oviposition index of gravid females to various doses of 3-methylpentanoic  
340 acid and hexanoic acid (right panel). Deviation of the index against zero was tested with Wilcoxon signed-  
341 rank test (n=17-20). \* p<0.05. Boxplots depict median and upper and lower quartile; whiskers depict  
342 quartiles +/- 1.5× the interquartile range (IQR). Any data points above the superior or below the inferior  
343 whisker values are considered as outliers. All data were included in the statistical analysis.

344 **Figure 2 | Detection and processing of frass-emitted** **(a)** Electroantennogram responses (EAG, in  $\mu\text{V} \pm$   
345 SEM, the response to solvent was subtracted) of *M. sexta* antennae isolated from wild type (WT), *Orco*<sup>-/-</sup>  
346 (*Orco* mutant), *Orco*<sup>+/-</sup> (*Orco* heterozygous), *Ir8a*<sup>-/-</sup> (*Ir8a* mutant), *Ir8a*<sup>+/-</sup> (*Ir8a* heterozygous), *Ir25a*<sup>-/-</sup>  
347 (*Ir25a* mutant), *Ir25a*<sup>+/-</sup> (*Ir25a* heterozygous). EAG responses to 3-methylpentanoic acid and hexanoic  
348 acid. **(b)** Percentage of coeloconic sensilla responding to the two behaviorally active acids in different  
349 genotypes **(c)** Heat map representation of SSR responses of coeloconic sensilla from different moth  
350 genotypes. **(d)** Schematic of 23 putative olfactory glomeruli at the dorsal surface of the right antennal lobe;  
351 the schematic was created for each individual moth based on the activation patterns of 19 diagnostic  
352 odorants<sup>45</sup>; numbers identify glomeruli that were most strongly activated by the tested acids (#16), or that  
353 showed acid-specific activation (#22, #23). **(e)** Examples of calcium imaging recordings in wildtype,  
354 *IR25a*<sup>-/-</sup>, and *IR8a*<sup>-/-</sup> female moths after stimulation with the two behaviorally active acids. The increase  
355 of fluorescence is color coded (see scale) and superimposed onto the view of the antennal lobe; circles  
356 indicate positions of glomeruli #16 (black outline), #22 (brown), #23 (blue). **(f)** Bars show the mean  
357 response of a glomerulus (after subtraction of the solvent response) to an odorant; error bars indicate  
358 standard deviation; bars with the same letter are not significantly different from each other (ANOVA, n=4-  
359 6 females/genotype).

360 **Figure 3 | IR8a is necessary for acid avoidance of ovipositing *M. sexta* females.** Two-choice assay  
361 showing the oviposition indexes of the homozygous and heterozygous (as a control) of *Ir25a* **(a)** and *Ir8a*  
362 **(b)** mutants for the frass-emitted compounds 3-methylpentanoic acid and hexanoic acid (for details on  
363 choice assay see Fig. 1 and methods section).

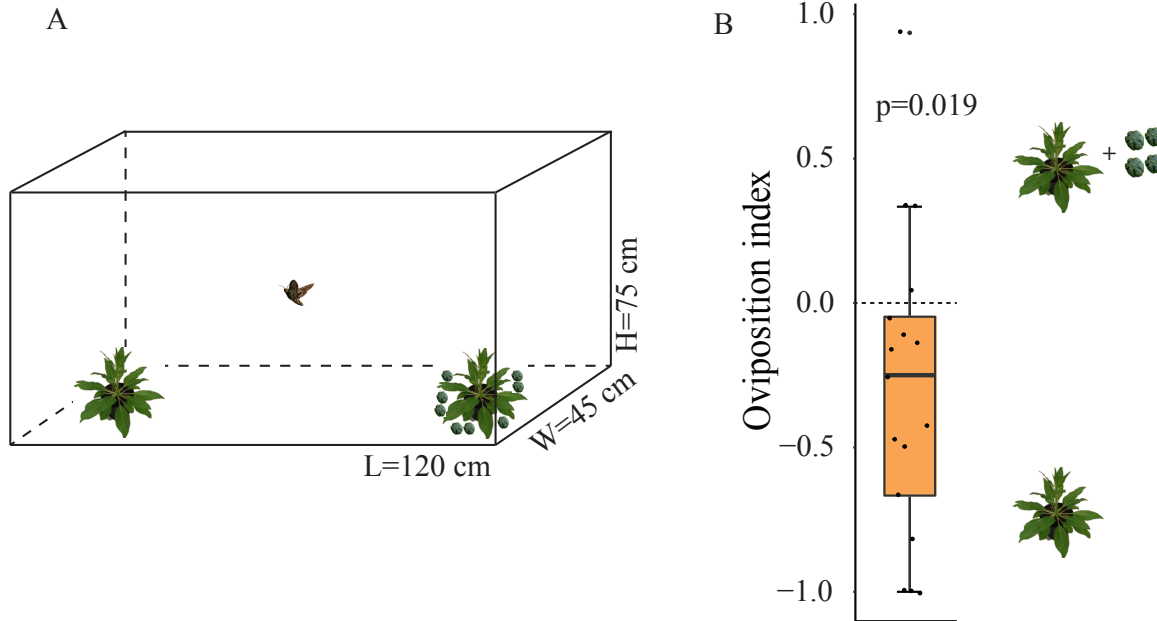

364  
365 **Supplementary Figure 1 | Frass avoidance of ovipositing *M. sexta* females is conserved in**  
366 **different behavioral assays.** (A) Schematic drawing of oviposition cage. (B) Oviposition index  
367 of WT *M. sexta* given a choice between *N. attenuata* and *N. attenuata* containing caterpillar frass  
368 in the oviposition cage. Deviation of the index against zero was tested with Wilcoxon signed-rank  
369 test (n=20). \* p<0.05. Boxplots depict median and upper and lower quartile; whiskers depict  
370 quartiles +/- 1.5× the interquartile range (IQR). Any data points above the superior or below the  
371 inferior whisker values are considered as outliers. All data were included in the statistical analysis.

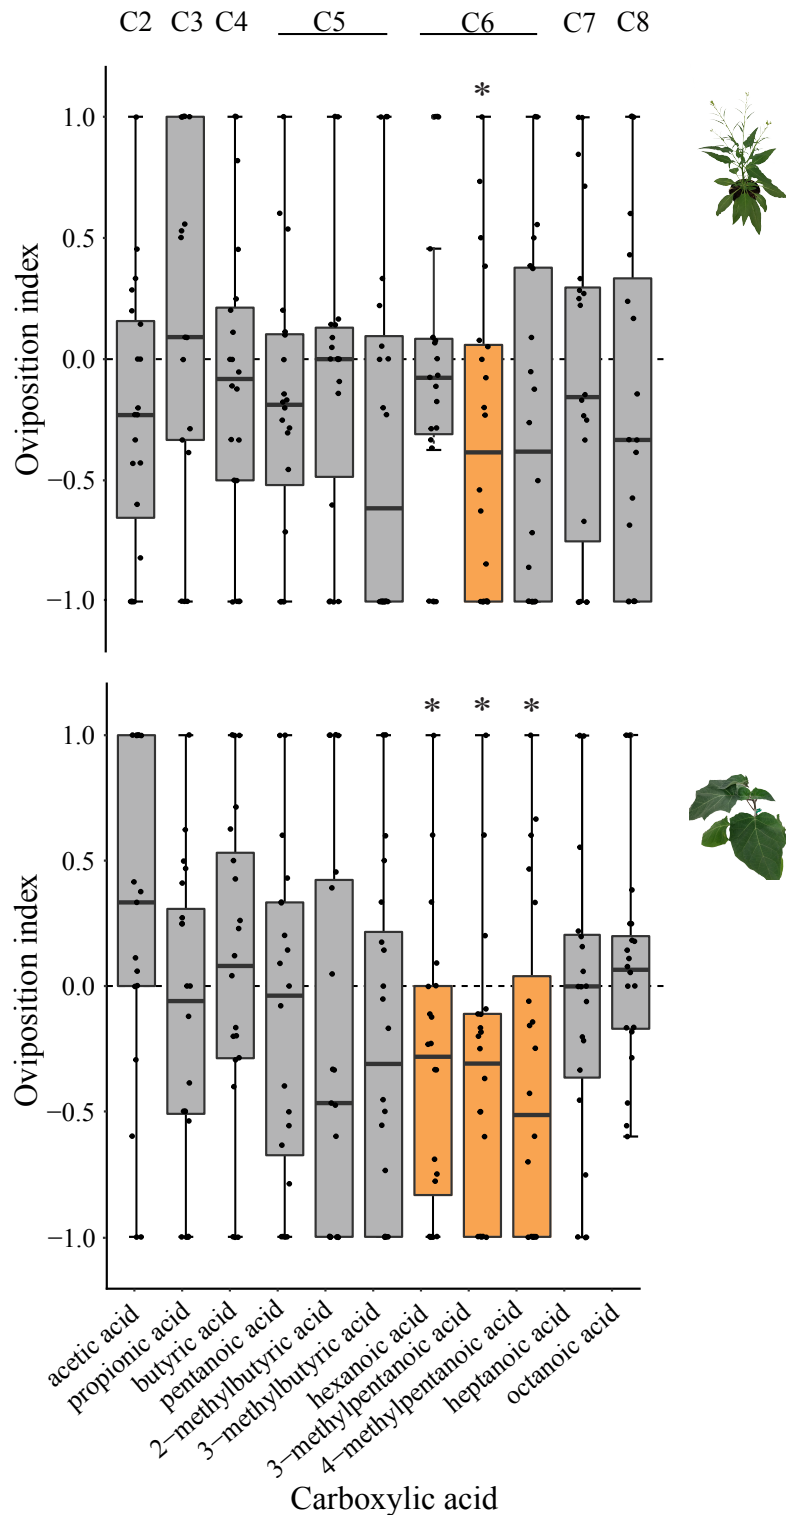

372

373 **Supplementary Figure 2 | Host-plant-specific effects of different carboxylic acids on *M.***

374 ***sexta*'s oviposition choice. (A)** Two-choice assay showing the preference of wild-type (WT)

375 females for carboxylic acids over control in the context of detached *N. attenuata* leaf. **(B)** Two-

376 choice assay showing the preference of wild-type (WT) females for carboxylic acids over control

377 in the context of detached *D. wrightii* leaf. Deviation of the index against zero was tested with  
 378 Wilcoxon signed-rank test (n=20). \* p<0.05. Part of these data are already shown in Fig. 1 f.  
 379 Please also consider that hexanoic acid obviously deters oviposition only in the right context, i.e.  
 380 when females oviposit on *Datura wrightii*.

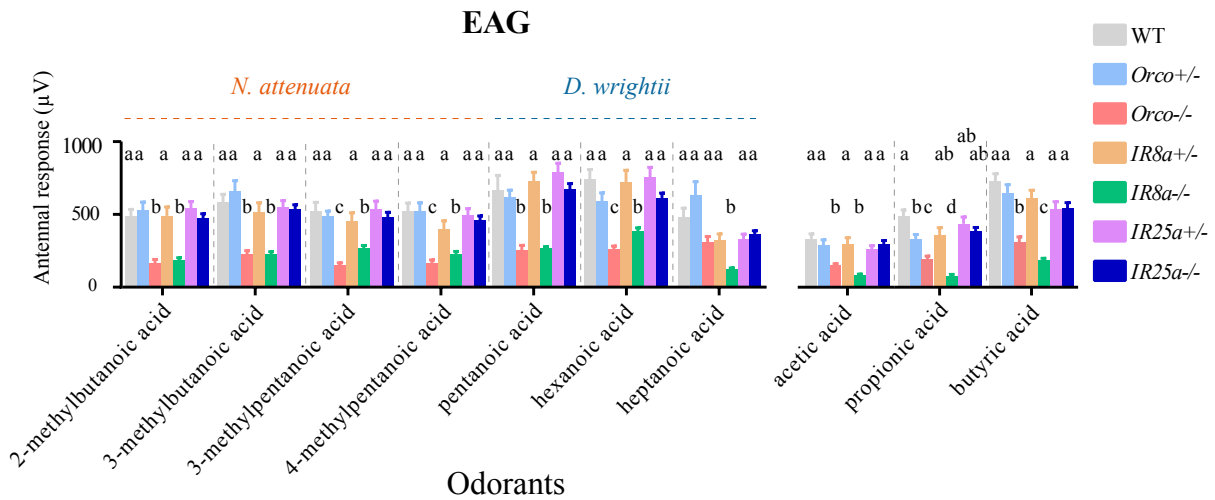

381  
 382 **Supplementary Figure 3 | Both *Orco*<sup>-/-</sup> and *Ir8a*<sup>-/-</sup> *M. sexta* exhibit reduced**  
 383 **electrophysiological responses to carboxylic acids.** Electroantennogram responses (EAG, in  
 384 mV ± SEM, the response to solvent was subtracted) of *M. sexta* antennae isolated from wild-type  
 385 (WT), *Orco*<sup>-/-</sup> (*Orco* mutant), *Orco*<sup>+/-</sup> (*Orco* heterozygous), *Ir8a*<sup>-/-</sup> (*Ir8a* mutant), *Ir8a*<sup>+/-</sup> (*Ir8a*  
 386 heterozygous), *Ir25a*<sup>-/-</sup> (*Ir25a* mutant), *Ir25a*<sup>+/-</sup> (*Ir25a* heterozygous). Responses to 3-  
 387 methylpentanoic acid and hexanoic acid have been shown in Figure 2. Different letters above  
 388 each odorant response indicate significant differences (one-way anova; p < 0.05); a is different  
 389 from b and c, and b is different from c and ab is not different from either a or b.



<sup>A</sup> Msex *Ir8a*<sup>-/-</sup> (OGS2: Msex2.10447-RB, isoform 1)  
Scaffold: JH668645.1: 185791..200130 (14.34 kb)

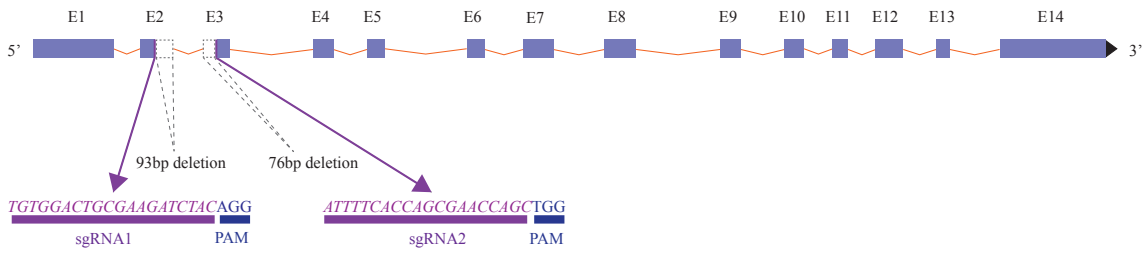

Msex *Ir25a*<sup>-/-</sup> (OGS2: Msex2.02645-RA, isoform 1)  
Scaffold: JH668318.1: 1060677..1080016 (19.34 kb)

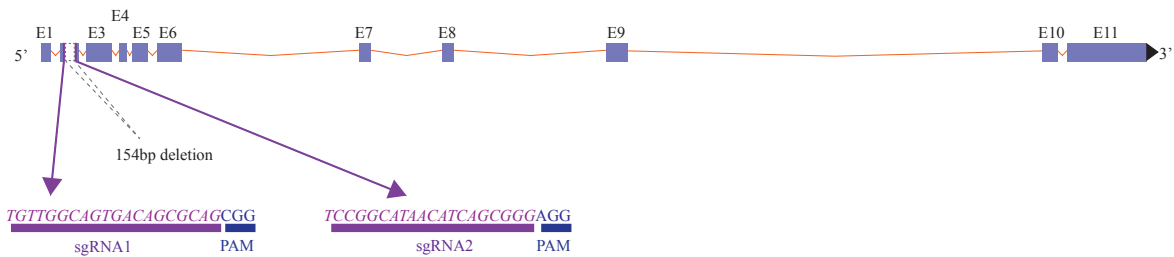

B

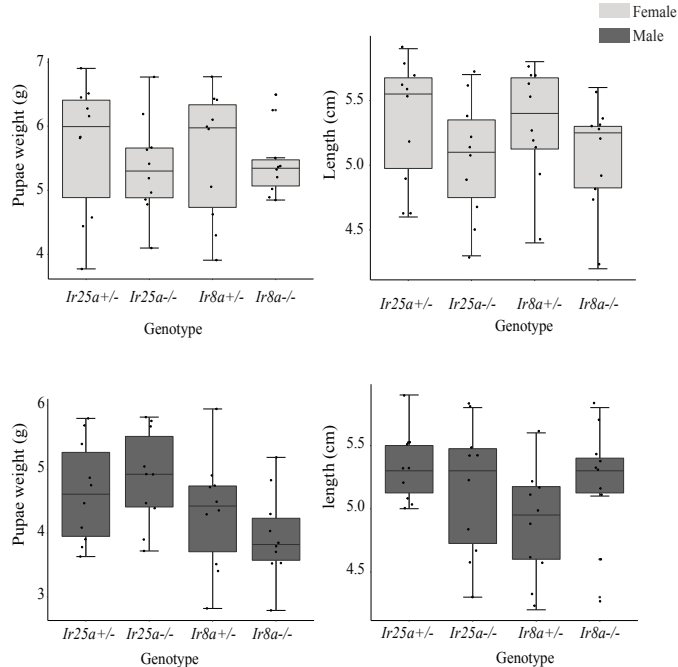

C

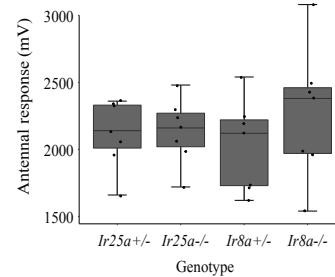

390

391 **Supplementary Figure 4 | Gene editing technique and potential off-target effects. (A)**

392 **Schematic of the genes targeted via CRISPR-Cas9. *Ir8a*<sup>-/-</sup> mutant contained a 339bp deletion**

393 **(93bp at exon2, 170bp at intron2 and 76bp at exon3) while the *Ir25a*<sup>-/-</sup> mutant contained a 154bp**

394 deletion (154bp at exon2) in the genome. PAM protospacer adjacent motif. (B) Weight (left) and  
 395 length (right) of female pupae from both *Ir8a* (upper panels) and *Ir25a* (lower panels) mutant and  
 396 heterozygous lines. There were no statistical differences among corresponding genotypes  
 397 (Wilcoxon signed-rank test, n=10). (C) EAG response of male adults toward pheromone  
 398 (bombykal) in all genotypes. There were no statistical differences among genotypes (one-way  
 399 ANOVA, n=7).

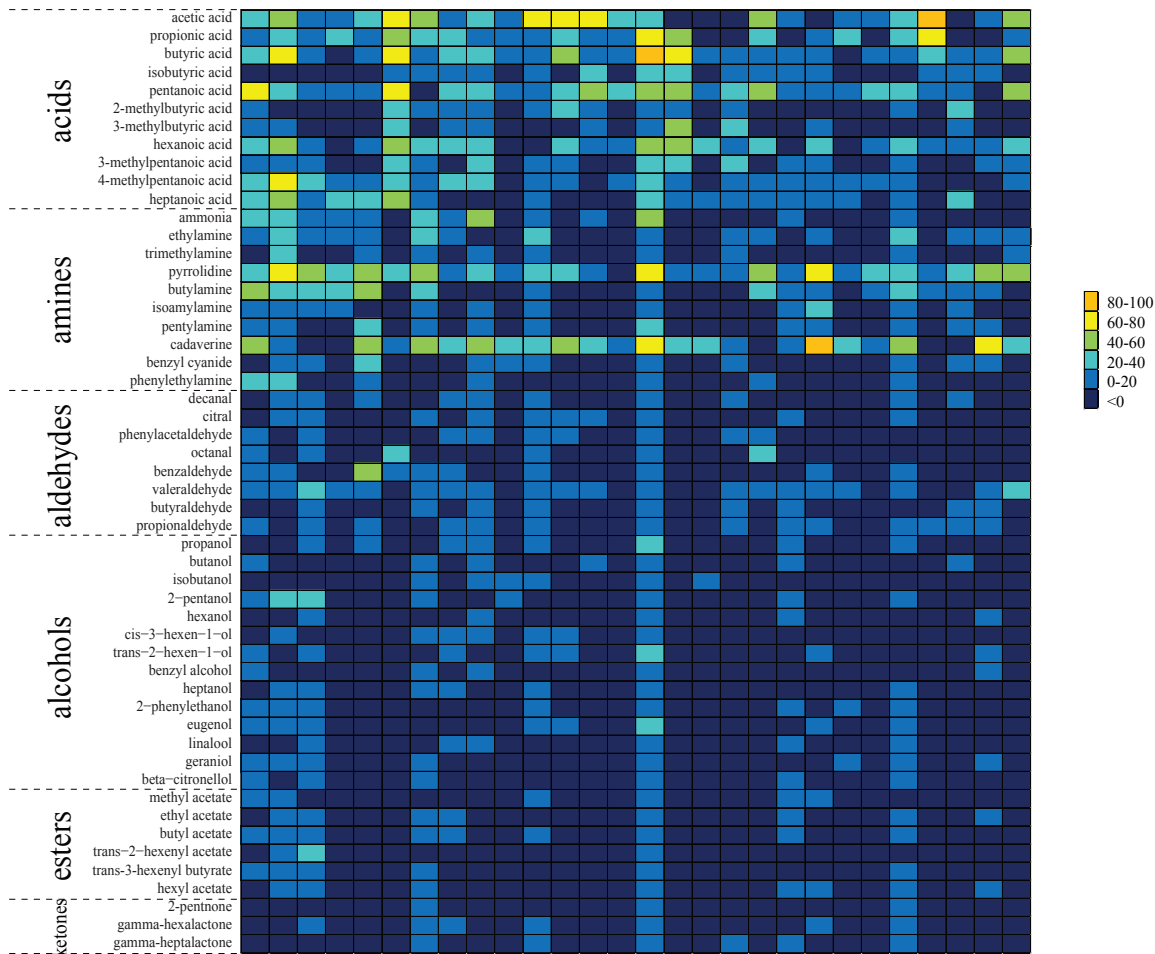

400  
 401 **Supplementary Figure 5 | Heatmap based on SSRs of 28 coeloconic sensilla from WT *M.***  
 402 ***sexta* to 52 screened odors.** Color-coded numbers depict difference in spikes/0.5s before and  
 403 after stimulus onset.

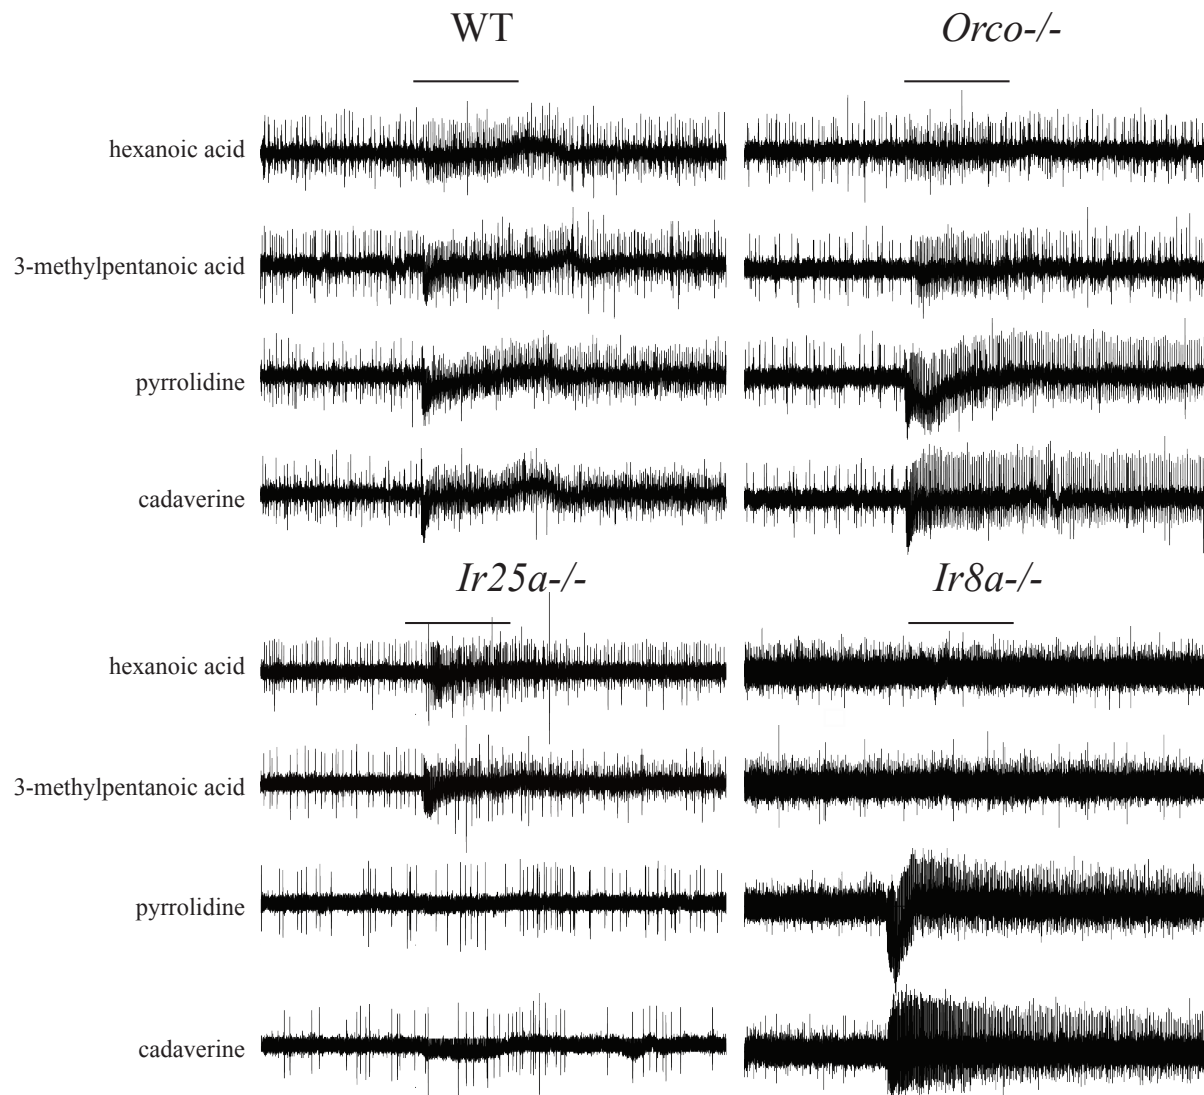

404

405 **Supplementary Figure 6 | Representative SSR traces of coeloconic sensilla.** Bars above the traces mark

406 0.5 s stimulus time.

407

408 References

409 1. Kelber A. Ovipositing butterflies use a red receptor to see green. *Journal of Experimental Biology*  
410 **202**, 2619-2630 (1999).

411

412 2. Barreto O, *et al.* Biological parameters of *Argyrotaenia montezumae* (Lepidoptera: Tortricidae)  
413 and influence of the oviposition substrate color on fecundity. *Annals of the Entomological Society*  
414 *of America* **109**, 671-677 (2016).

415

416 3. Joseph RM, Devineni AV, King IFG, Heberlein U. Oviposition preference for and positional  
417 avoidance of acetic acid provide a model for competing behavioral drives in *Drosophila*. *Proc Natl*  
418 *Acad Sci U S A* **106**, 11352-11357 (2009).

- 419  
420 4. Chen Y, Amrein H. Ionotropic Receptors Mediate *Drosophila* oviposition preference through sour  
421 gustatory receptor neurons. *Current Biology* **27**, 2741-2750 (2017).
- 422  
423 5. Kroder S, Samietz J, Dorn S. Effect of ambient temperature on mechanosensory host location in  
424 two parasitic wasps of different climatic origin. *Physiological Entomology* **31**, 299-305 (2006).
- 425  
426 6. Dweck HKM, *et al.* Olfactory preference for egg laying on citrus substrates in *Drosophila*. *Current*  
427 *Biology* **23**, 2472-2480 (2013).
- 428  
429 7. Molnar BP, Toth Z, Karpati Z. Synthetic blend of larval frass volatiles repel oviposition in the  
430 invasive box tree moth, *Cydalima perspectalis*. *Journal of Pest Science* **90**, 873-885 (2017).
- 431  
432 8. Hansson Bill S, Stensmyr Marcus C. Evolution of insect olfaction. *Neuron* **72**, 698-711 (2011).
- 433  
434 9. Benton R, Vannice KS, Gomez-Diaz C, Vosshall LB. Variant ionotropic glutamate receptors as  
435 chemosensory receptors in *Drosophila*. *Cell* **136**, 149-162 (2009).
- 436  
437 10. Butterwick JA, *et al.* Cryo-EM structure of the insect olfactory receptor Orco. *Nature* **560**, 447-452  
438 (2018).
- 439  
440 11. Benton R, Sachse S, Michnick SW, Vosshall LB. Atypical membrane topology and heteromeric  
441 function of *Drosophila* odorant receptors in vivo. *Plos Biology* **4**, 240-257 (2006).
- 442  
443 12. Vosshall LB, Stocker RF. Molecular architecture of smell and taste in *Drosophila*. *Annu Rev*  
444 *Neurosci* **30**, 505-533 (2007).
- 445  
446 13. Koenig C, *et al.* A reference gene set for chemosensory receptor genes of *Manduca sexta*. *Insect*  
447 *Biochemistry and Molecular Biology* **66**, 51-63 (2015).
- 448  
449 14. Schultze A, Breer H, Krieger J. The blunt trichoid sensillum of female mosquitoes, *Anopheles*  
450 *gambiae*: Odorant binding protein and receptor types. *Int J Biol Sci* **10**, 426-437 (2014).
- 451  
452 15. Guo M, Krieger J, Grosse-Wilde E, Missbach C, Zhang L, Breer H. Variant ionotropic receptors are  
453 expressed in olfactory sensory neurons of coeloconic sensilla on the antenna of the desert locust  
454 (*Schistocerca gregaria*). *Int J Biol Sci* **10**, 1-14 (2014).
- 455  
456 16. Kirkness EF, *et al.* Genome sequences of the human body louse and its primary endosymbiont  
457 provide insights into the permanent parasitic lifestyle. *Proceedings of the National Academy of*  
458 *Sciences* **107**, 12168-12173 (2010).

- 459  
460 17. Smith CD, *et al.* Draft genome of the globally widespread and invasive Argentine ant (*Linepithema*  
461 *humile*). *Proceedings of the National Academy of Sciences* **108**, 5673-5678 (2011).
- 462  
463 18. Hallem EA, Carlson JR. Coding of odors by a receptor repertoire. *Cell* **125**, 143-160 (2006).
- 464  
465 19. Stengl M, Funk NW. The role of the coreceptor Orco in insect olfactory transduction. *J Comp*  
466 *Physiol A -Neuroethol Sens Neural Behav Physiol* **199**, 897-909 (2013).
- 467  
468 20. Croset V, *et al.* Ancient protostome origin of chemosensory ionotropic glutamate receptors and  
469 the evolution of insect taste and olfaction. *PLoS Genet* **6**, (2010).
- 470  
471 21. Abuin L, Bargeton B, Ulbrich MH, Isacoff EY, Kellenberger S, Benton R. Functional architecture of  
472 olfactory ionotropic glutamate receptors. *Neuron* **69**, 44-60 (2011).
- 473  
474 22. Silbering AF, *et al.* Complementary function and integrated wiring of the evolutionarily distinct  
475 *Drosophila* olfactory subsystems. *Journal of Neuroscience* **31**, 13357-13375 (2011).
- 476  
477 23. Ai M, Blais S, Park JY, Min S, Neubert TA, Suh GS. Ionotropic glutamate receptors IR64a and IR8a  
478 form a functional odorant receptor complex in vivo in *Drosophila*. *The Journal of neuroscience :*  
479 *the official journal of the Society for Neuroscience* **33**, 10741-10749 (2013).
- 480  
481 24. Raji JI, *et al.* *Aedes aegypti* mosquitoes detect acidic volatiles found in human odor using the IR8a  
482 pathway. *Current Biology*, (2019).
- 483  
484 25. Hussain A, *et al.* Ionotropic chemosensory receptors mediate the taste and smell of polyamines.  
485 *Plos Biology* **14**, (2016).
- 486  
487 26. Ni L, *et al.* The ionotropic receptors IR21a and IR25a mediate cool sensing in *Drosophila*. *Elife* **5**,  
488 (2016).
- 489  
490 27. Enjin A, *et al.* Humidity sensing in *Drosophila*. *Current Biology* **26**, 1352-1358 (2016).
- 491  
492 28. Jaeger AH, *et al.* A complex peripheral code for salt taste in *Drosophila*. *Elife* **7**, (2018).
- 493  
494 29. Haverkamp A, Hansson BS, Knaden M. Combinatorial codes and labeled lines: How insects use  
495 olfactory cues to find and judge food, mates, and oviposition sites in complex environments. *Front*  
496 *Physiol* **9**, (2018).
- 497

- 498 30. Fandino RA, *et al.* Mutagenesis of odorant co-receptor Orco fully disrupts foraging but not  
499 oviposition behaviors in the hawkmoth *Manduca sexta*. *bioRxiv*, 541201 (2019).
- 500
- 501 31. Kessler A, Baldwin IT. Defensive function of herbivore-induced plant volatile emissions in nature.  
502 *Science* **291**, 2141-2144 (2001).
- 503
- 504 32. Loke WH, Ashley TR. Potential uses of kairomones for behavioral manipulation of *Cotesia*  
505 *marginiventris* (Cresson). *J Chem Ecol* **10**, 1377-1384 (1984).
- 506
- 507 33. Weinhold A, Baldwin IT. Trichome-derived O-acyl sugars are a first meal for caterpillars that tags  
508 them for predation. *Proc Natl Acad Sci U S A* **108**, 7855-7859 (2011).
- 509
- 510 34. Wilson JK, Woods HA. Protection via parasitism: *Datura* odors attract parasitoid flies, which inhibit  
511 *Manduca* larvae from feeding and growing but may not help plants. *Oecologia* **179**, 1159-1171  
512 (2015).
- 513
- 514 35. Grégoire J-C, Baisier M, Drumont A, Dahlsten DL, Meyer H, Francke W. Volatile compounds in the  
515 larval frass of *Dendroctonus valens* and *Dendroctonus micans* (Coleoptera: Scolytidae) in relation  
516 to oviposition by the predator, *Rhizophagus grandis* (Coleoptera: Rhizophagidae). *J Chem Ecol* **17**,  
517 2003-2019 (1991).
- 518
- 519 36. Kumari A, Kaushik N. Oviposition deterrents in herbivorous insects and their potential use in  
520 integrated pest management. *Indian Journal of Experimental Biology* **54**, 163-174 (2016).
- 521
- 522 37. Spathe A, Reinecke A, Olsson SB, Kesavan S, Knaden M, Hansson BS. Plant species- and status-  
523 specific odorant blends guide oviposition choice in the moth *Manduca sexta*. *Chemical Senses* **38**,  
524 147-159 (2013).
- 525
- 526 38. Reisenman CE, Riffell JA, Duffy K, Pesque A, Mikles D, Goodwin B. Species-specific effects of  
527 herbivory on the oviposition behavior of the moth *Manduca sexta*. *J Chem Ecol* **39**, 76-89 (2013).
- 528
- 529 39. Couto A, Alenius M, Dickson BJ. Molecular, anatomical, and functional organization of the  
530 *Drosophila* olfactory system. *Curr Biol* **15**, 1535-1547 (2005).
- 531
- 532 40. Yao CA, Ignell R, Carlson JR. Chemosensory coding by neurons in the coeloconic sensilla of the  
533 *Drosophila* antenna. *Journal of Neuroscience* **25**, 8359-8367 (2005).
- 534
- 535 41. Shields VDC, Hildebrand JG. Recent advances in insect olfaction, specifically regarding the  
536 morphology and sensory physiology of antennal sensilla of the female sphinx moth *Manduca*  
537 *sexta*. *Microscopy Research and Technique* **55**, 307-329 (2001).

538



- 539 42. Ghaninia M, Olsson SB, Hansson BS. Physiological organization and topographic mapping of the  
540 antennal olfactory sensory neurons in female hawkmoths, *Manduca sexta*. *Chemical Senses* **39**,  
541 655-671 (2014).
- 542
- 543 43. Pophof B. Olfactory responses recorded from sensilla coeloconica of the silkmoth *Bombyx mori*.  
544 *Physiological Entomology* **22**, 239-248 (1997).
- 545
- 546 44. Delventhal R, Carlson JR. Bitter taste receptors confer diverse functions to neurons. *Elife* **5**, (2016).
- 547
- 548 45. Bisch-Knaden S, Dahake A, Sachse S, Knaden M, Hansson BS. Spatial representation of feeding and  
549 oviposition odors in the brain of a hawkmoth. *Cell Reports* **22**, 2482-2492 (2018).
- 550
- 551 46. Li GQ, Ishikawa Y. Oviposition deterrents in larval frass of four *Ostrinia* species fed on an artificial  
552 diet. *J Chem Ecol* **30**, 1445-1456 (2004).
- 553
- 554 47. Xu HY, Li GQ, Liu ML, Xing GN. Oviposition deterrents in larval frass of the cotton boll worm,  
555 *Helicoverpa armigera* (Lepidoptera: Noctuidae): Chemical identification and  
556 electroantennography analysis. *Journal of Insect Physiology* **52**, 320-326 (2006).
- 557
- 558 48. Horikoshi M, Takabayashi J, Yano S, Yamaoka R, Ohsaki N, Sato Y. *Cotesia glomerata* female wasps  
559 use fatty acids from plant-herbivore complex in host searching. *J Chem Ecol* **23**, 1505-1515 (1997).
- 560
- 561 49. Garcia-Robles I, et al. Combining hexanoic acid plant priming with *Bacillus thuringiensis*  
562 insecticidal activity against colorado potato beetle. *Int J Mol Sci* **14**, 12138-12156 (2013).
- 563
- 564 50. Haverkamp A, Bing J, Badeke E, Hansson BS, Knaden M. Innate olfactory preferences for flowers  
565 matching proboscis length ensure optimal energy gain in a hawkmoth. *Nature Communications* **7**,  
566 (2016).

## 567 **Acknowledgements**

568 We thank the glasshouse team of Max Planck Institute for Chemical Ecology for plant cultivation; Sascha  
569 Bucks for rearing *M. sexta*; Vajihah Jafari, Dima Ward, Syed Ali Komail Raza for help with the wind  
570 tunnel experiments. We express our gratitude to Kerstin Weniger for her technical support. This work was  
571 supported by the Max Planck Society (B.S.H) and the Alexander von Humboldt Foundation (J.Z.).

## 572 **Author contributions**

573 J.Z., M.K. and B.S.H. designed the study; J.Z. performed all SSR and GC-MS experiments. J.Z. and S.W.Y.  
574 conducted wind tunnel assays, EAG experiments and measured pupae weight. J.Z., R.F., G.F.O., and  
575 E.G.W designed sgRNA and established CRISPR/Cas9 knockouts. S.B.K. performed the calcium imaging  
576 experiments. The original manuscript was written by J.Z., subsequently edited by M.K., S.B.K. and B.S.H.,  
577 and all coauthors contributed to the final version of this paper.

578

579

580 Table S1. List of 52 tested stimuli.

| <b>Odorant name</b>    | <b>CAS Number</b> | <b>Odorant name</b>      | <b>CAS Number</b> |
|------------------------|-------------------|--------------------------|-------------------|
| acetic acid            | 64-19-7           | propanol                 | 71-23-8           |
| propanoic acid         | 79-09-4           | butanol                  | 71-36-3           |
| butyric acid           | 107-92-6          | isobutanol               | 78-83-1           |
| isobutyric acid        | 79-31-2           | 2-pentanol               | 6032-29-7         |
| pentanoic acid         | 109-52-4          | hexanol                  | 111-27-3          |
| 2-methylbutyric acid   | 116-53-0          | cis-3-hexen-1-ol         | 928-96-1          |
| 3-methylbutyric acid   | 503-74-2          | trans-2-hexen-1-ol       | 928-95-0          |
| hexanoic acid          | 142-62-1          | benzyl alcohol           | 202-859-9         |
| 3-methylpentanoic acid | 105-43-1          | heptanol                 | 111-70-6          |
| 4-methylpentanoic acid | 646-07-1          | 2-phenylethanol          | 60-12-8           |
| heptanoic acid         | 111-14-8          | eugenol                  | 97-53-0           |
| ammonia                | 7664-41-7         | linalool                 | 78-70-6           |
| ethylamine             | 75-04-7           | geraniol                 | 106-24-1          |
| trimethylamine         | 75-50-3           | beta-citronellol         | 106-22-9          |
| pyrrolidine            | 123-75-1          | methyl acetate           | 79-20-9           |
| butylamine             | 109-73-9          | ethyl acetate            | 141-78-6          |
| isoamylamine           | 107-85-7          | butyl acetate            | 123-86-4          |
| pentylamine            | 110-58-7          | trans-2-hexenyl acetate  | 2497-18-9         |
| cadaverine             | 462-94-2          | trans-3-hexenyl butyrate | 53398-84-8        |
| benzyl cyanide         | 140-29-4          | hexyl acetate            | 142-92-7          |
| phenylethylamine       | 64-04-0           | 2-pentnone               | 107-87-9          |
| decanal                | 112-31-2          | gamma-hexalactone        | 695-06-7          |
| citral                 | 5392-40-5         | gamma-heptalactone       | 105-21-5          |
| phenylacetaldehyde     | 122-78-1          | octanal                  | 124-13-0          |
| butyraldehyde          | 123-72-8          | benzaldehyde             | 100-52-7          |
| propionaldehyde        | 123-38-6          | valeraldehyde            | 110-62-3          |

581
